# Supplementary material for: Exploring the Impact of Head Group Modifications on the Anticancer Activities of Fatty-Acid-like Platinum(IV) Prodrugs: A Structure–Activity Relationship Study
Source: MDPI journal article supplement (doi:10.3390/ijms241713301), 2023-08-27
Supplement: s1 [file s1]

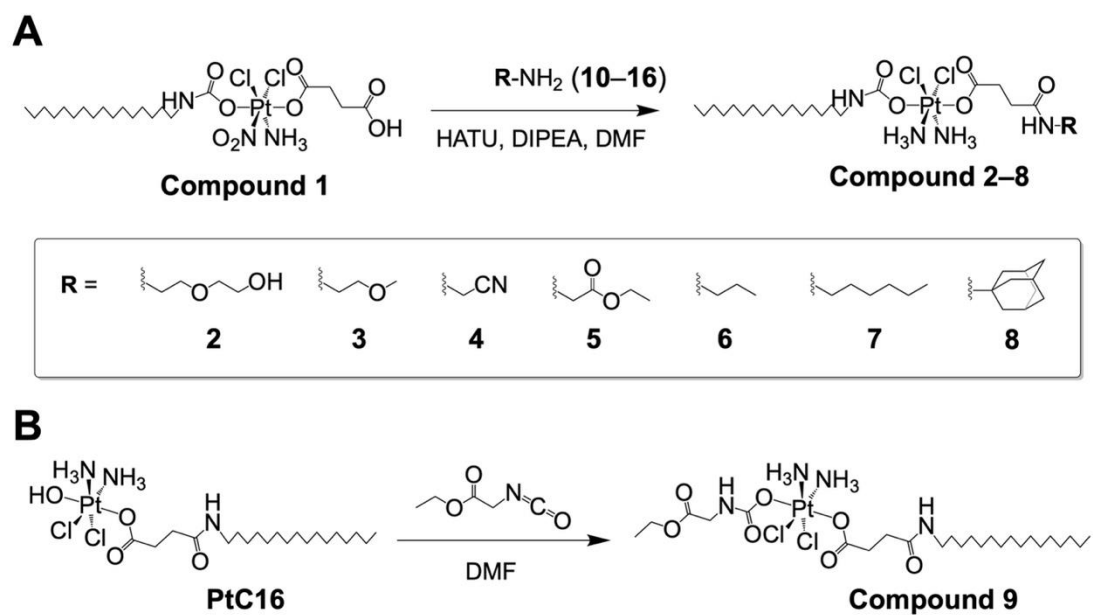

**Figure S1.** Synthetic routes for preparing FALPs: A. Synthesis of Compound 2-8; B. Synthesis of Compound 9.

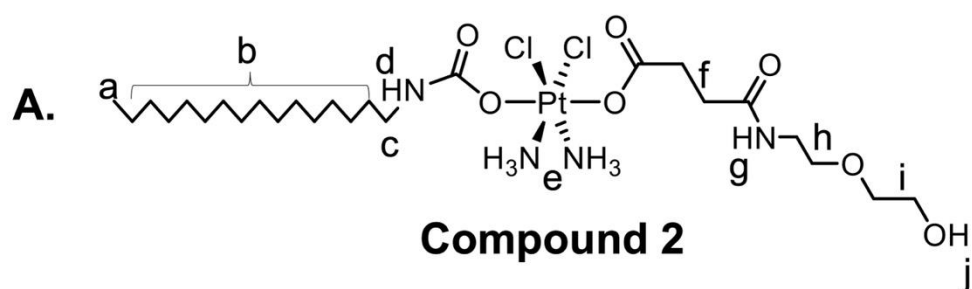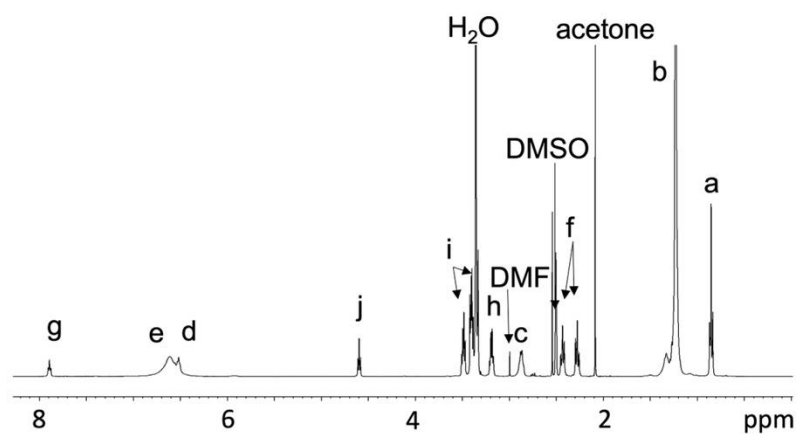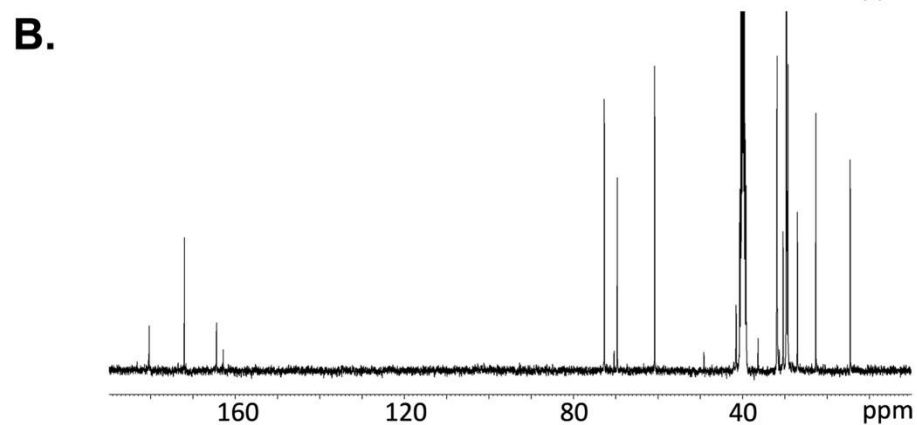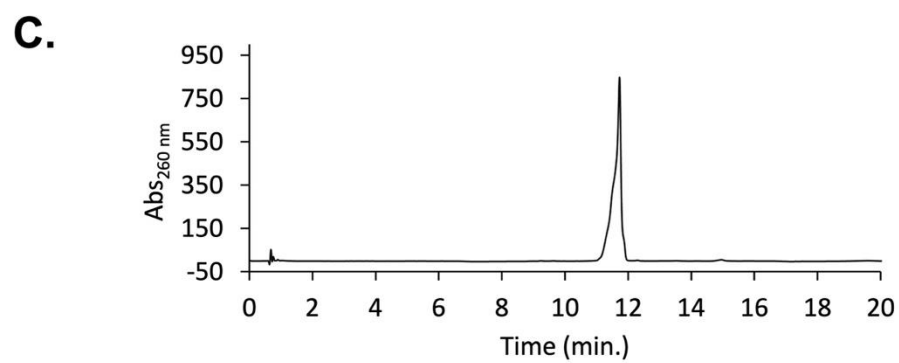

**Figure S2.** Characterization of Compound 2: A.  $^1\text{H}$  NMR; B.  $^{13}\text{C}$  NMR; C. HPLC.

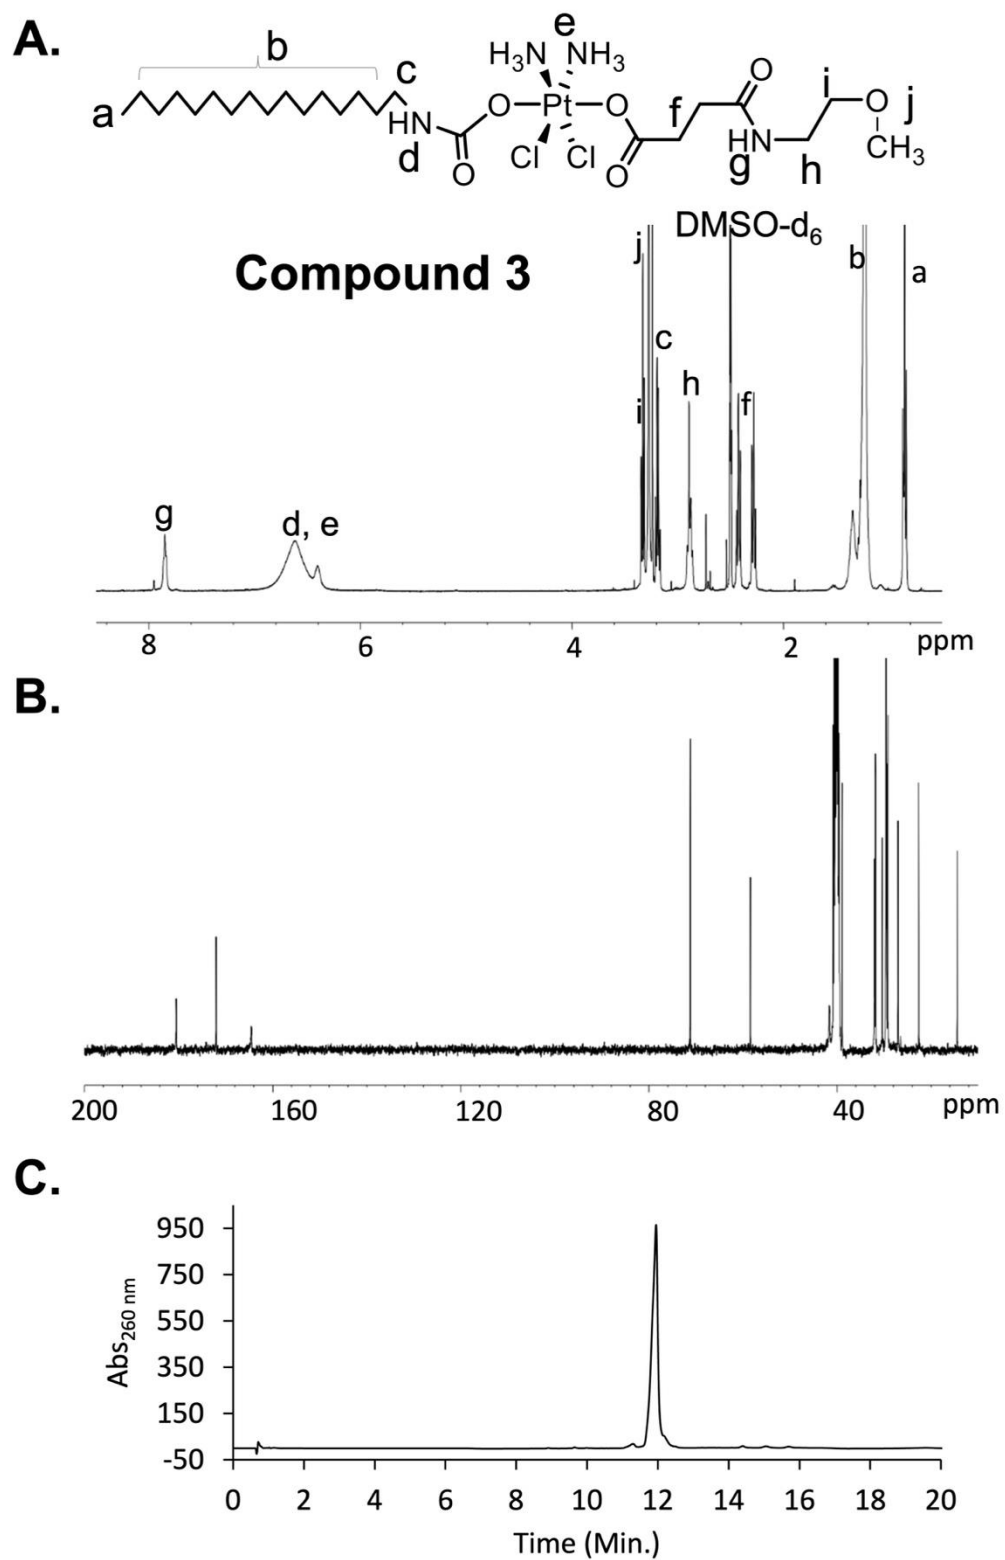

**Figure S3.** Characterization of Compound **3**: A. <sup>1</sup>H NMR; B. <sup>13</sup>C NMR; C. HPLC.

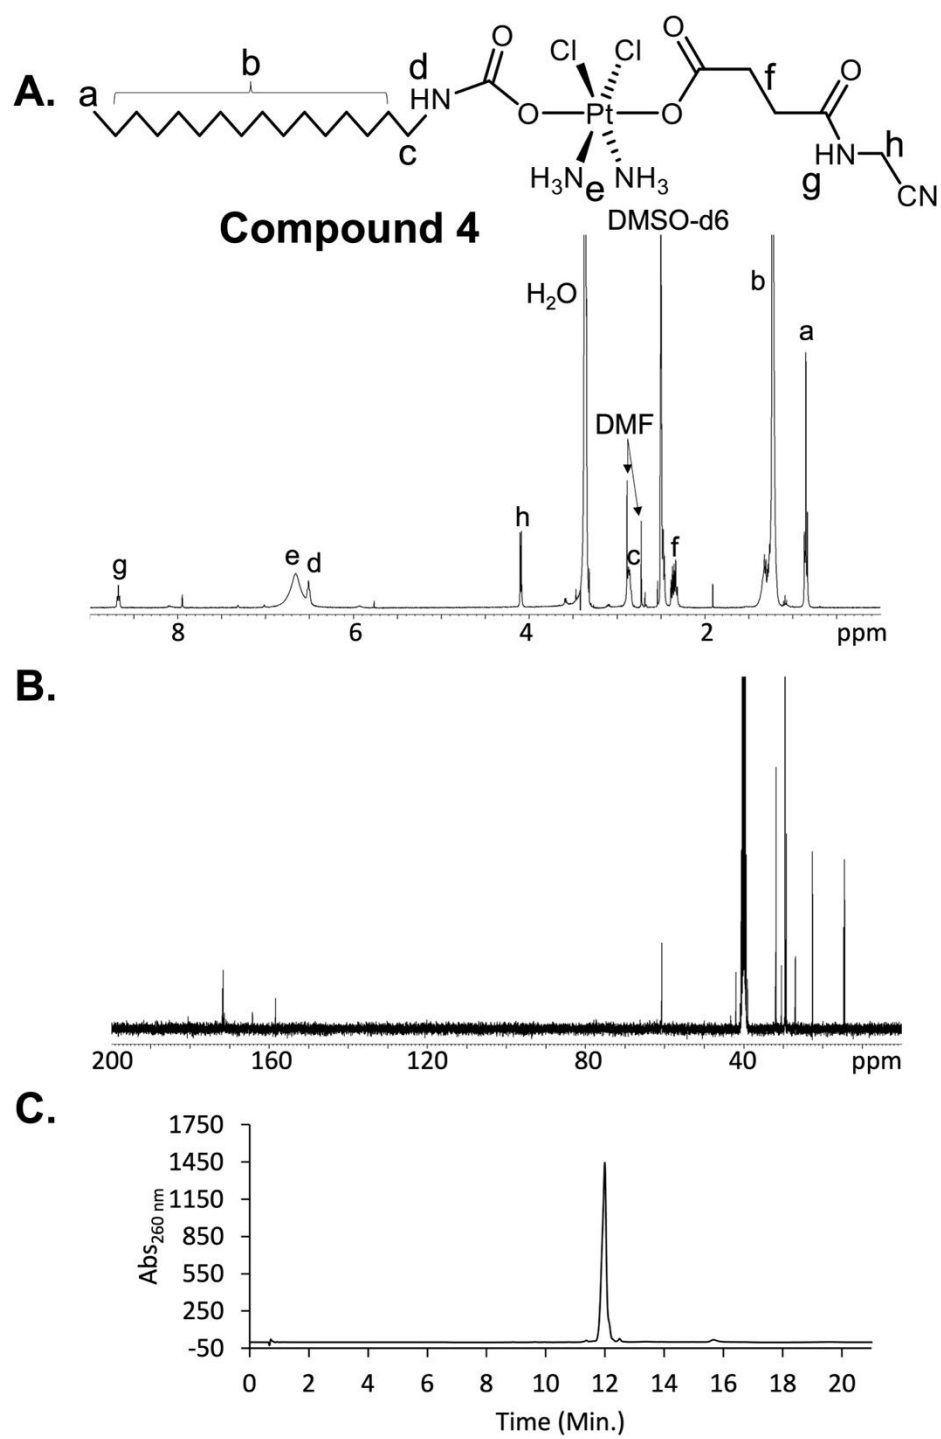

**Figure S4.** Characterization of Compound **4**: A.  $^1\text{H}$  NMR; B.  $^{13}\text{C}$  NMR; C. HPLC.

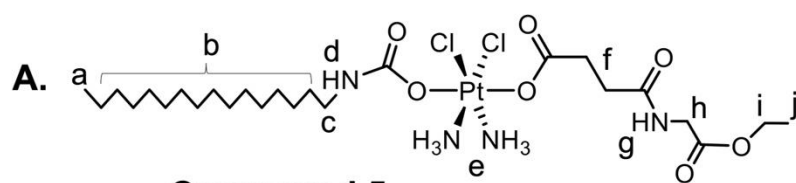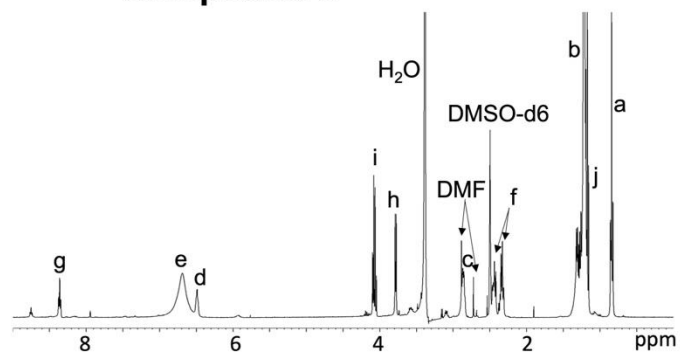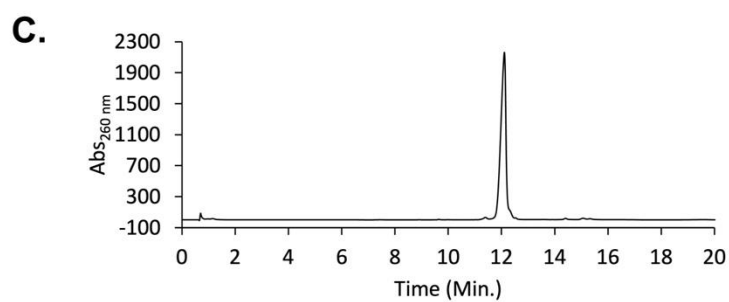

**Figure S5.** Characterization of Compound **5**: A.  $^1\text{H}$  NMR; B.  $^{13}\text{C}$  NMR; C. HPLC.

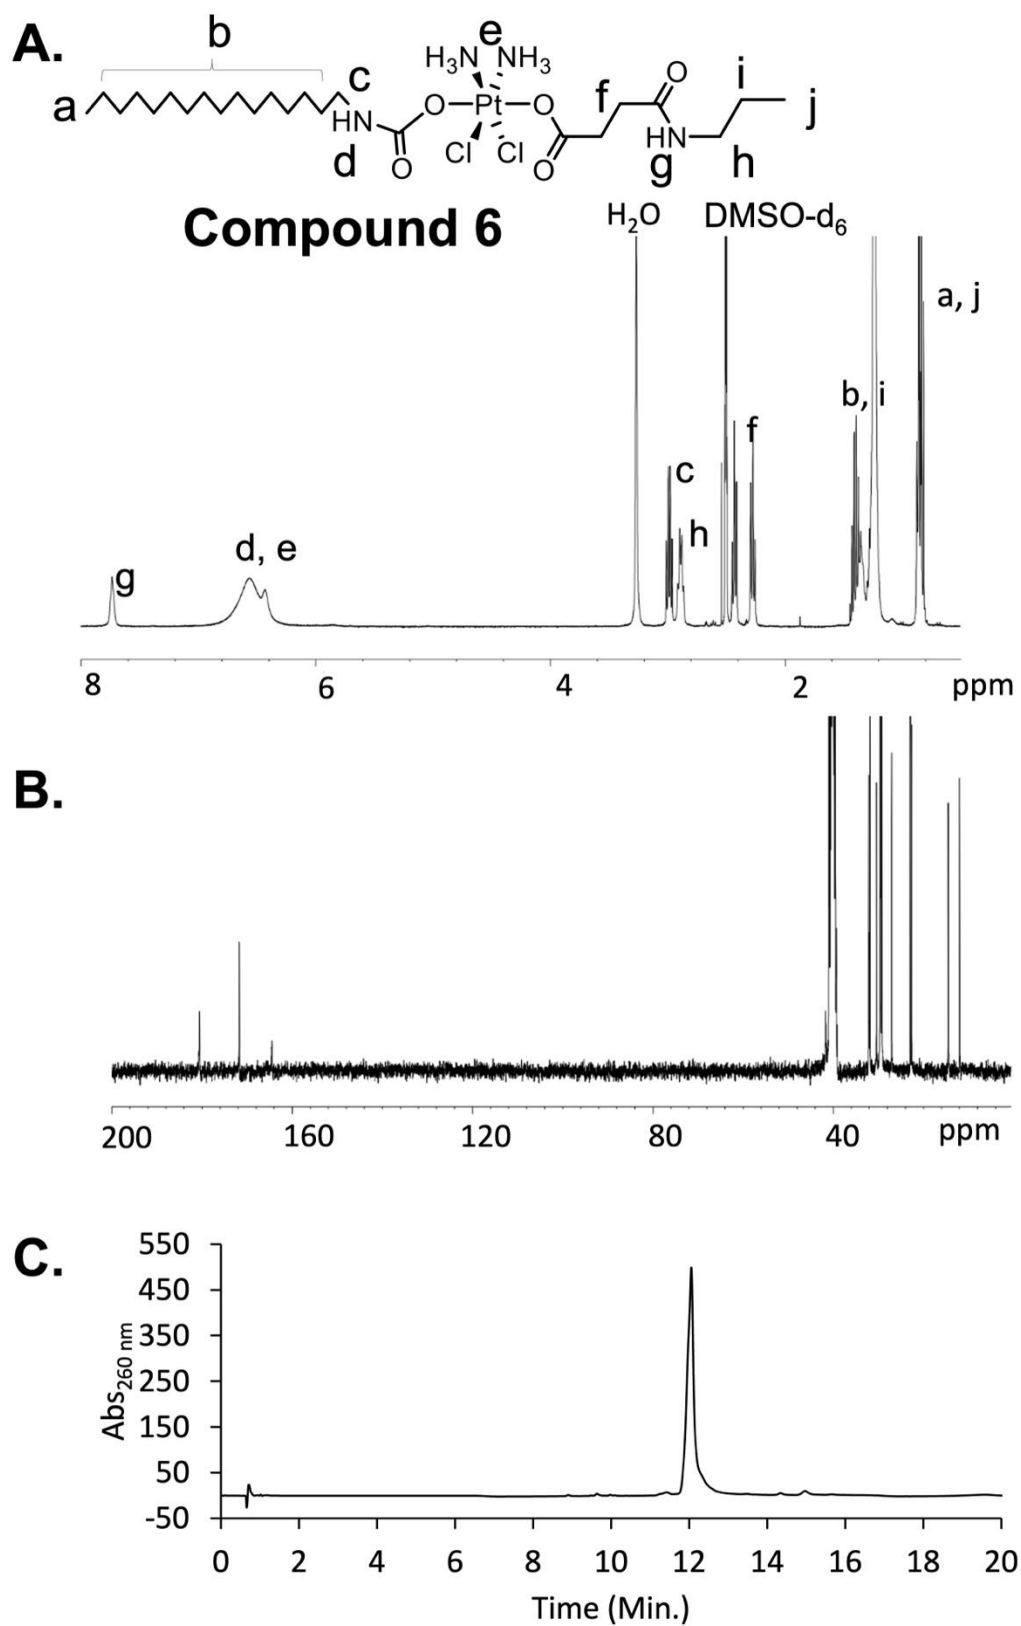

**Figure S6.** Characterization of Compound **6**: A.  $^1\text{H}$  NMR; B.  $^{13}\text{C}$  NMR; C. HPLC.

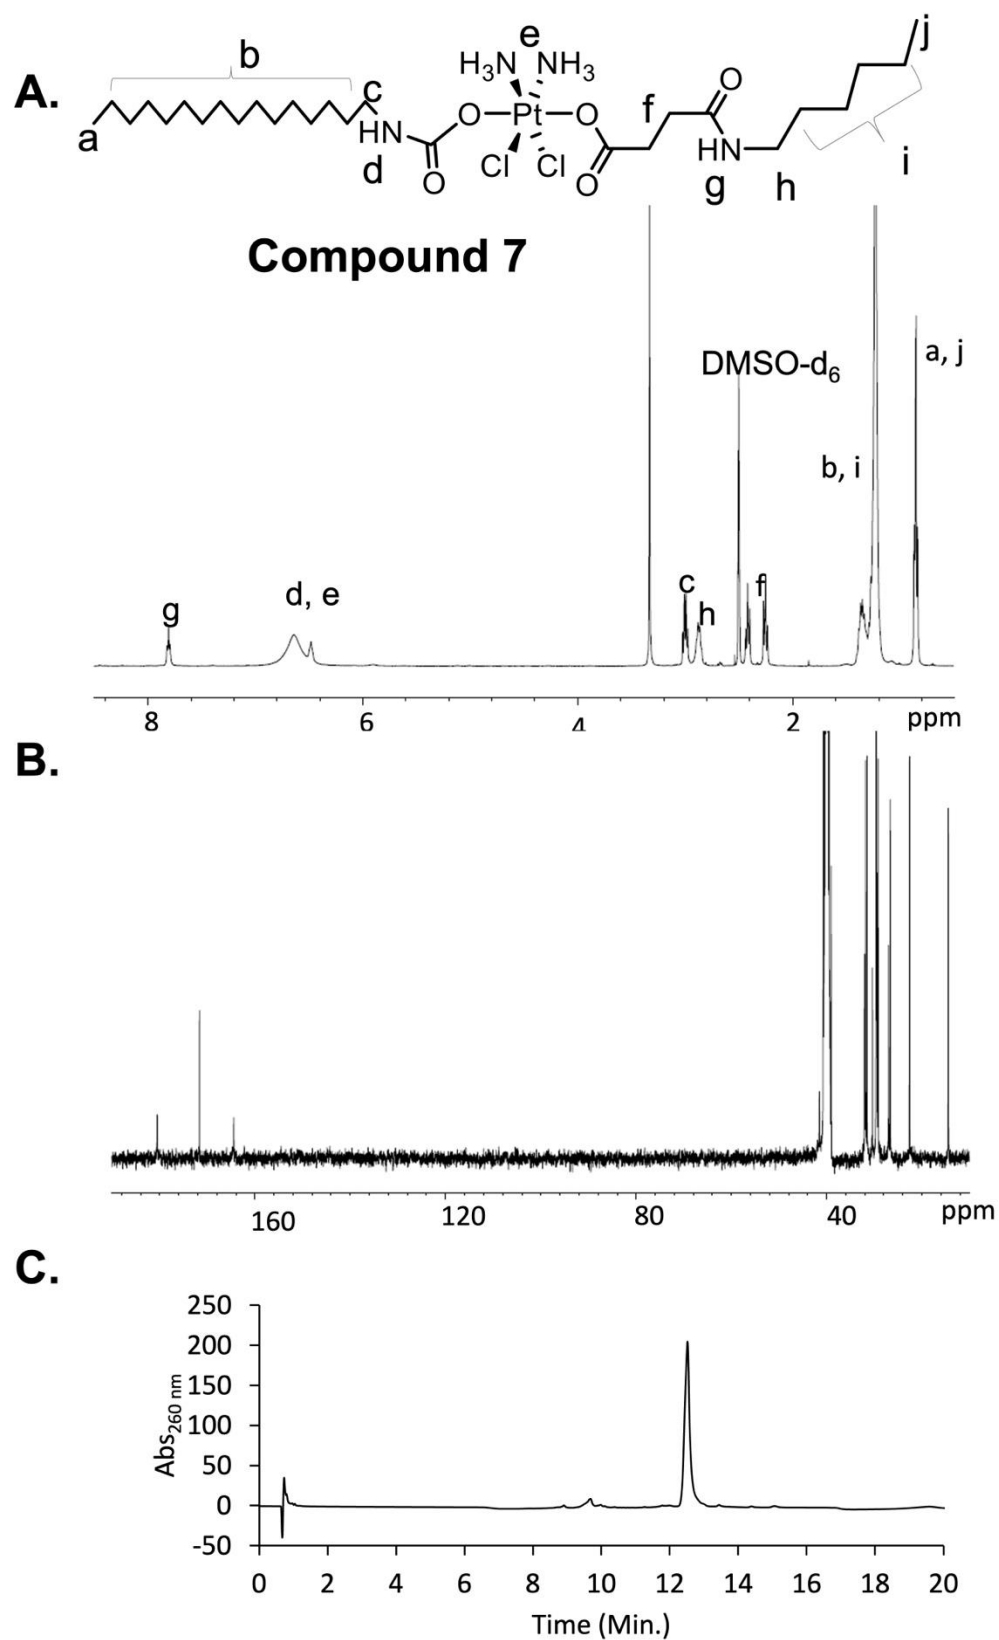

**Figure S7.** Characterization of Compound 7: A. <sup>1</sup>H NMR; B. <sup>13</sup>C NMR; C. HPLC.

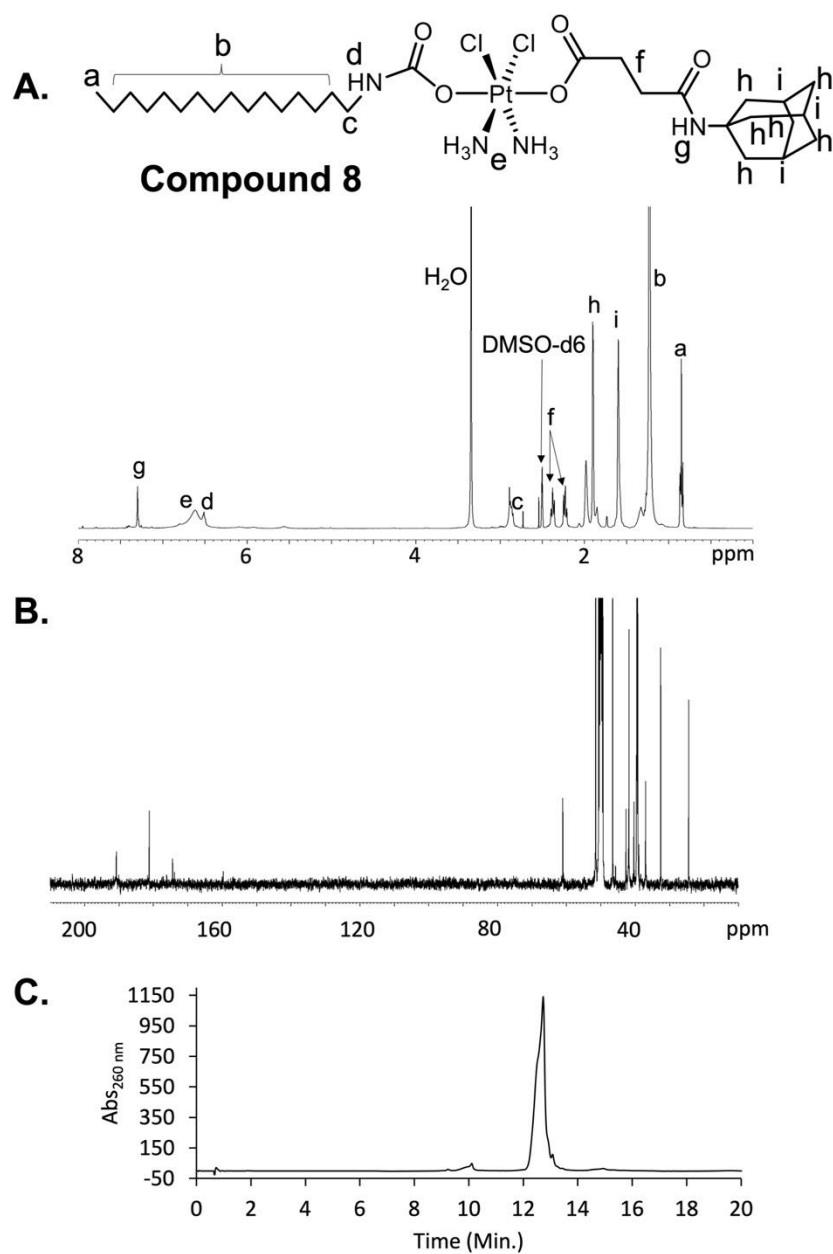

**Figure S8.** Characterization of Compound **8**: A.  $^1\text{H}$  NMR; B.  $^{13}\text{C}$  NMR; C. HPLC.



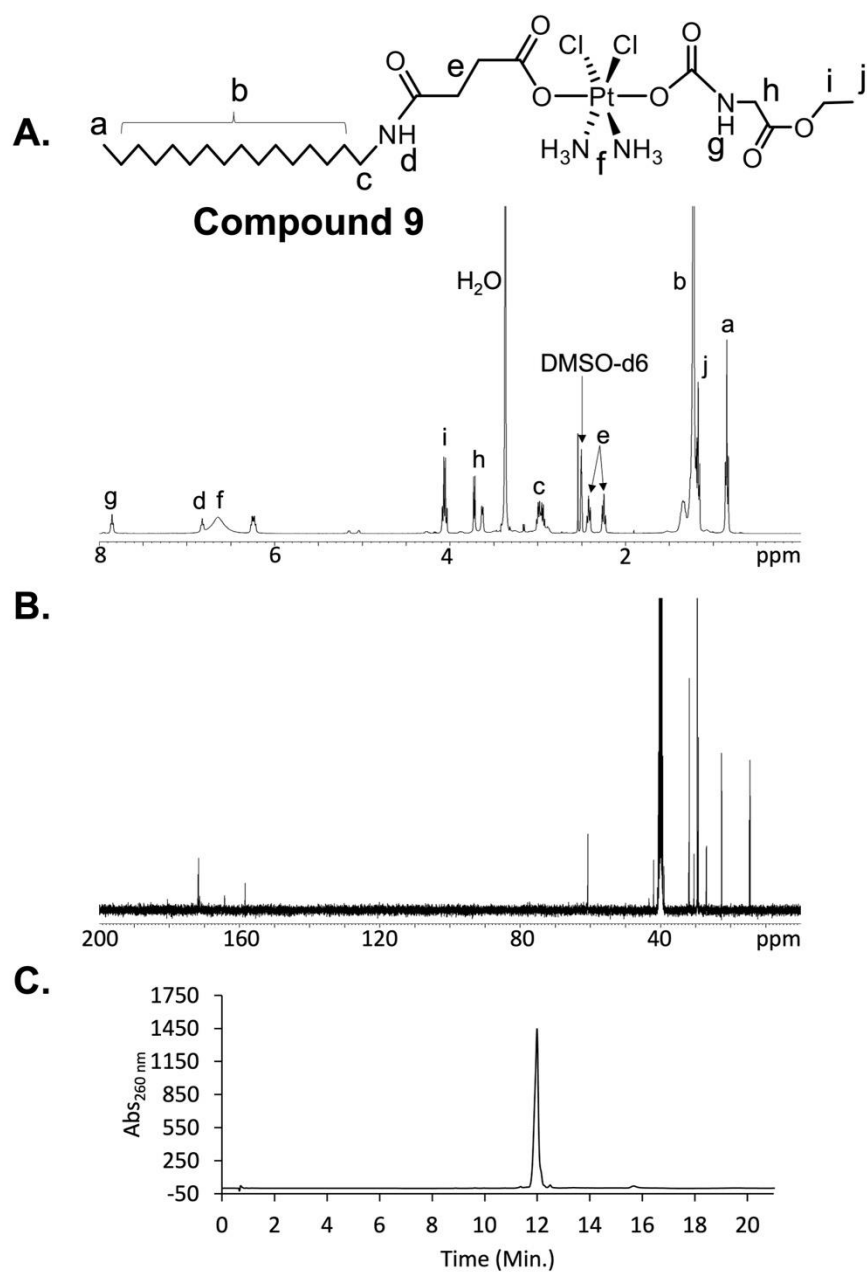

**Figure S9.** Characterization of Compound **9**: A.  $^1\text{H}$  NMR; B.  $^{13}\text{C}$  NMR; C. HPLC.
